# Supplementary material for: Additive effects of Na+ and Cl– ions on barley growth under salinity stress
Source: PubMed Central journal article supplement — J Exp Bot. 2011 Jan 27;62(6):2189–203. doi: 10.1093/jxb/erq422 (PMC3060698; doi:10.1093/jxb/erq422), 2011-01-27
Supplement: supp_erq422_00055178-file001.pdf [file supp_erq422_00055178-file001.pdf]

# Additive effects of Na<sup>+</sup> and Cl<sup>-</sup> ions on barley growth under salinity stress

*Ehsan Tavakkoli, Foad Fatehi, Stewart Coventry, Pichu Rengasamy, and Glenn K McDonald*

## Supplementary Material

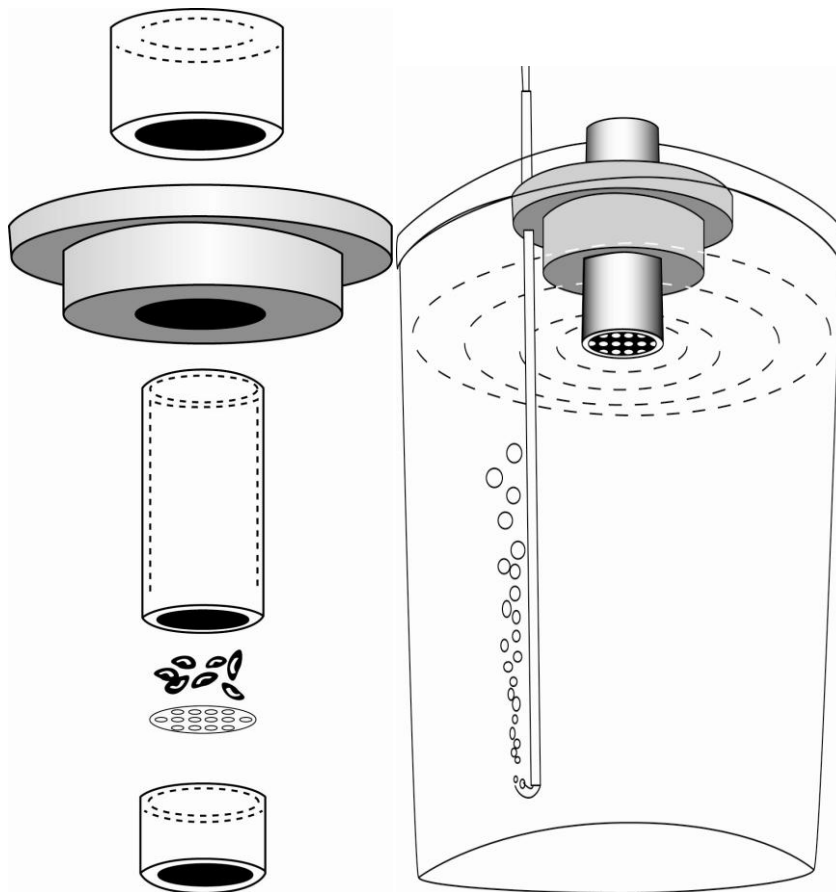

**Figure 1S.** The supported hydroponic system used in experiment 1 and 2.
